# Supplementary material for: Multi-omics and Mendelian Randomization network analysis of the association between metabolic and cognitive functions in the UK Biobank Database
Source: bioRxiv or medRxiv preprint supplement (doi:10.1101/2024.05.30.24307732), 2024-05-31
Supplement: Supplementary file [file media-5.pdf]

| ID UKB METABOLIC | FULL NAME                       | ID UKB COGNITIVE | FULL NAME             |
|------------------|---------------------------------|------------------|-----------------------|
| SBP              | Systolic Blood Pressure         | WM               | Working Memory        |
| DBP              | Diastolic Blood Pressure        | EM               | Episodic Memory       |
| HDL              | High Density Lipoproteins       | FIQ              | Fluid IQ              |
| LDL              | Low Density Lipoproteins        | RT               | Reaction Test         |
| Glucose          | Glucose                         | VAT              | Visual Attention Test |
| WC               | Waist Circumference             |                  |                       |
| HC               | Hip Circumference               |                  |                       |
| TRIG             | Triglycerides                   |                  |                       |
| Weight           | Weight                          |                  |                       |
| HB               | Glycated Hemoglobin             |                  |                       |
| BMI              | Body Mass Index                 |                  |                       |
| VATV             | Visceral Adipose Tissue Volume  |                  |                       |
| VATM             | Visceral Adipose Tissue Mass    |                  |                       |
| BFP              | Body Fat Percentage             |                  |                       |
| BFM              | Body Fat Mass                   |                  |                       |
| AATV             | Abdominal Adipose Tissue Volume |                  |                       |
| CHOL             | Cholesterol                     |                  |                       |
|                  |                                 |                  |                       |
|                  |                                 |                  |                       |
